# Supplementary material
Source: publisher figshare collection journal article supplement (https://tandf.figshare.com/ndownloader/files/16761515)
Supplement: Supplementary file 1 [file 16761515]

**Supplementary Material**

Synthesis of three new binuclear Mn complexes: Characterization and DNA binding and cleavage properties

YING-YING KOU*, QIAN ZHAO, XUE-RAO WANG, MEI-LING LI and XIANG-HAO REN

Figure S1. UV-vis spectra of **1**.

Figure S2. UV-vis spectra of **2**.

Figure S3. UV-vis spectra of **3**.
